# Supplementary material
Source: PubMed Central journal article supplement (PMC2487673)
Supplement: NIHMS54729-supplement-01.pdf [file NIHMS54729-supplement-01.pdf]

**Supplemental Table 1: Accuracy and Reaction Time Across Experimental Rounds**

|                     | Accuracy<br>(Mean $\pm$ SD) | t-value<br>(compared to chance<br>performance, *indicates<br>$p < 0.05$ , two-tailed) | Reaction time<br>(ms; Mean $\pm$ SD) |
|---------------------|-----------------------------|---------------------------------------------------------------------------------------|--------------------------------------|
| Round 1             | 50% $\pm$ 0                 | N/A                                                                                   | 2012 $\pm$ 330                       |
| Round 2             | 61.97% $\pm$ 7.74           | $t(10) = 5.13^*$                                                                      | 2133 $\pm$ 220                       |
| Round 3             | 75.15% $\pm$ 7.13           | $t(10) = 11.70^*$                                                                     | 2039 $\pm$ 214                       |
| immediate post-test | 83.03% $\pm$ 8.06           | $t(10) = 13.60^*$                                                                     | 2854 $\pm$ 595                       |
| 1 week post-test    | 71.67% $\pm$ 11.60          | $t(9) = 5.91^*$                                                                       | 3639 $\pm$ 752                       |

Note: The 1 week post-test results do not include data from one participant, who failed to return for the post-test.
