# Supplementary material
Source: PubMed Central journal article supplement (PMC2487673)
Supplement: NIHMS54729-supplement-02.pdf [file NIHMS54729-supplement-02.pdf]

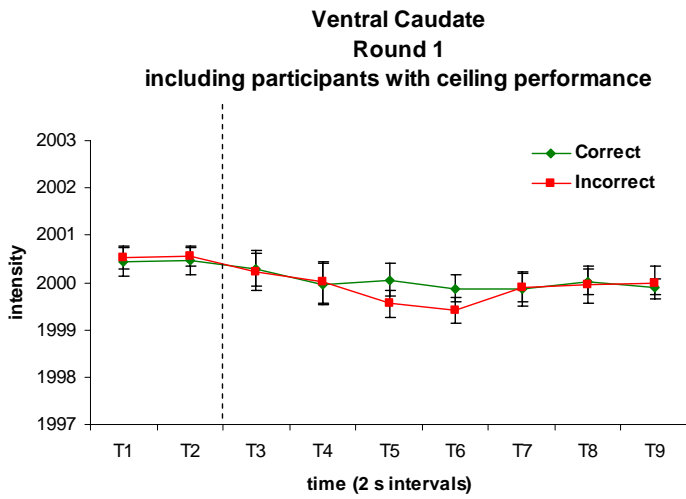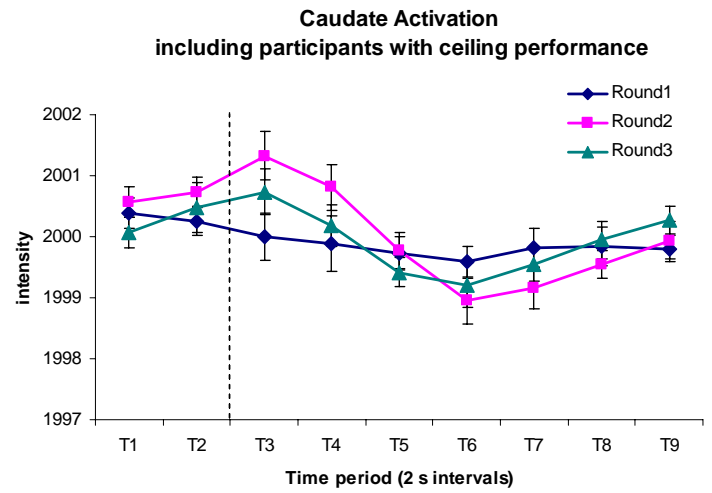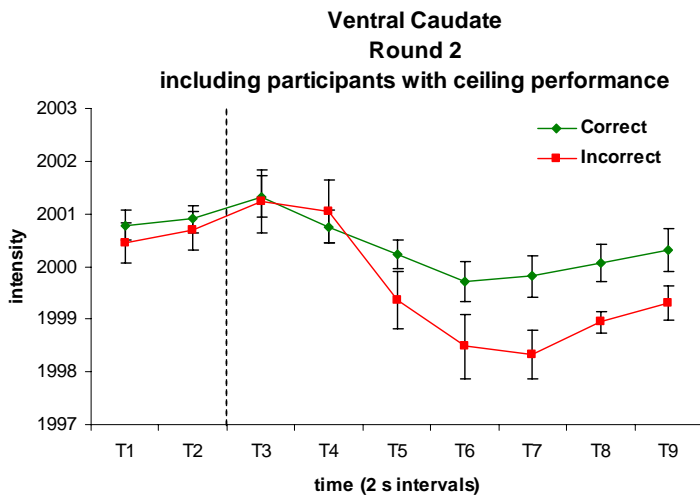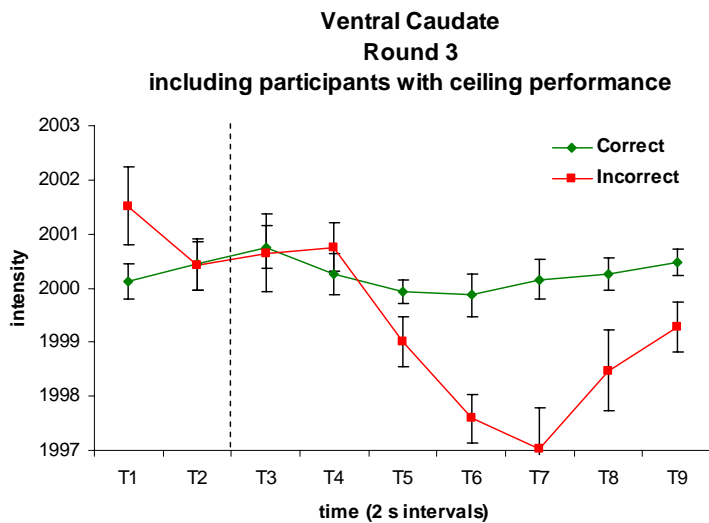

**Supplemental Figure 1. Time Courses of Activation in the Caudate With Participants With Ceiling Performance Included.**

The effects of round an accuracy on the signal in the caudate, including the data from those subjects with ceiling performance, are shown (the Round 3 accuracy graph omits data from one subject who had no incorrect trials on this round). Each time period (T1, T2, etc.) represents a 2 s image acquisition. The dotted line indicates the onset of the feedback display.
